# Supplementary material
Source: PubMed Central journal article supplement (PMC7473775)
Supplement: NIHMS1614839-supplement-Supplementary_Material.pdf [file NIHMS1614839-supplement-Supplementary_Material.pdf]

**Supplemental tables and figures for the manuscript:**

**Characterization of upregulated adhesion GPCRs in Acute Myeloid Leukemia**

Jiawen Yang<sup>1</sup>, Sharon Wu<sup>1</sup>, Houda Alachkar<sup>1</sup>

<sup>1</sup>School of Pharmacy, University of Southern California, Los Angeles, CA

**Table S1. The frequencies of patients with upregulated and downregulated aGPCR genes in TCGA-AML dataset**

| Genes   | Number of patients with gene upregulation | Number of patients with gene downregulation |
|---------|-------------------------------------------|---------------------------------------------|
| ADGRB1  | 23                                        | 0                                           |
| CELSR2  | 19                                        | 0                                           |
| ADGRD1  | 16                                        | 0                                           |
| ADGRE1  | 21                                        | 0                                           |
| ADGRE2  | 28                                        | 25                                          |
| ADGRE5  | 22                                        | 10                                          |
| ADGRG1  | 20                                        | 0                                           |
| ADGRG3  | 23                                        | 0                                           |
| ADGRA1  | 4                                         | 0                                           |
| ADGRA2  | 27                                        | 0                                           |
| ADGRA3  | 22                                        | 27                                          |
| ADGRB2  | 15                                        | 0                                           |
| ADGRB3  | 9                                         | 0                                           |
| CELSR1  | 20                                        | 0                                           |
| CELSR3  | 15                                        | 0                                           |
| ADGRD2  | 13                                        | 0                                           |
| ADGRE3  | 14                                        | 0                                           |
| ADGRE4P | 12                                        | 0                                           |
| ADGRF1  | 5                                         | 0                                           |
| ADGRF2  | 1                                         | 0                                           |
| ADGRF3  | 20                                        | 18                                          |
| ADGRF4  | 3                                         | 0                                           |
| ADGRF5  | 15                                        | 0                                           |
| ADGRG2  | 20                                        | 11                                          |
| ADGRG4  | 15                                        | 0                                           |
| ADGRG5  | 25                                        | 32                                          |
| ADGRG6  | 7                                         | 0                                           |
| ADGRG7  | 2                                         | 0                                           |
| ADGRL1  | 16                                        | 0                                           |
| ADGRL2  | 15                                        | 0                                           |
| ADGRL3  | 13                                        | 0                                           |
| ADGRL4  | 14                                        | 0                                           |
| ADGRV1  | 6                                         | 0                                           |

**Table S2a.** Expression of *BAI1(ADGRB1)* (Z-score $\geq$ 1) according to the top mutations present in AML (N=173 patients)

| Genes        | Z-score(<1) |         | Z-score( $\geq$ 1) |        | p value |
|--------------|-------------|---------|--------------------|--------|---------|
|              |             | (n=150) |                    | (n=23) |         |
| FLT3(n, %)   | 40          | 26.7%   | 9                  | 39.1%  | 0.223   |
| TP53(n, %)   | 5           | 3.3%    | 9                  | 39.1%  | <0.001  |
| WT1(n, %)    | 10          | 6.7%    | 0                  | 0.0%   | 0.362   |
| IDH1(n, %)   | 14          | 9.3%    | 2                  | 8.7%   | >0.999  |
| IDH2(n, %)   | 17          | 11.3%   | 0                  | 0.0%   | 0.133   |
| CEBPA(n, %)  | 12          | 8.0%    | 1                  | 4.3%   | >0.999  |
| RUNX1(n, %)  | 15          | 10.0%   | 0                  | 0.0%   | 0.225   |
| NRAS(n, %)   | 10          | 6.7%    | 2                  | 8.7%   | 0.663   |
| TET2(n, %)   | 11          | 7.3%    | 4                  | 17.4%  | 0.119   |
| NPM1(n, %)   | 40          | 26.7%   | 8                  | 34.8%  | 0.456   |
| DNMT3A(n, %) | 34          | 22.7%   | 8                  | 34.8%  | 0.204   |

**Table S2b.** Expression of *CELSR2(ADGRC1)* (Z-score $\geq$ 1) according to the top mutations present in AML (N=173 patients)

| Genes        | Z-score(<1) |         | Z-score( $\geq$ 1) |        | p value |
|--------------|-------------|---------|--------------------|--------|---------|
|              |             | (n=152) |                    | (n=21) |         |
| FLT3(n, %)   | 45          | 29.6%   | 4                  | 19.0%  | 0.440   |
| TP53(n, %)   | 13          | 8.6%    | 1                  | 4.8%   | >0.999  |
| WT1(n, %)    | 9           | 5.9%    | 1                  | 4.8%   | >0.999  |
| IDH1(n, %)   | 16          | 10.5%   | 0                  | 0.0%   | 0.224   |
| IDH2(n, %)   | 15          | 9.9%    | 2                  | 9.5%   | >0.999  |
| CEBPA(n, %)  | 13          | 8.6%    | 0                  | 0.0%   | 0.372   |
| RUNX1(n, %)  | 13          | 8.6%    | 2                  | 9.5%   | >0.999  |
| NRAS(n, %)   | 12          | 7.9%    | 0                  | 0.0%   | 0.365   |
| TET2(n, %)   | 14          | 9.2%    | 1                  | 4.8%   | 0.698   |
| NPM1(n, %)   | 42          | 27.6%   | 6                  | 28.6%  | >0.999  |
| DNMT3A(n, %) | 37          | 24.3%   | 5                  | 23.8%  | >0.999  |

**Table S2c.** Expression of *GPR133 (ADGRD1)* (Z-score $\geq$ 1) according to the top mutations present in AML (N=173 patients)

| Genes        | Z-score(<1)<br>(n=156) |       | Z-score( $\geq$ 1)<br>(n=17) |       | p value      |
|--------------|------------------------|-------|------------------------------|-------|--------------|
| FLT3(n, %)   | 46                     | 29.5% | 3                            | 17.6% | 0.402        |
| TP53(n, %)   | 10                     | 6.4%  | 4                            | 23.5% | <b>0.035</b> |
| WT1(n, %)    | 10                     | 6.4%  | 0                            | 0.0%  | 0.601        |
| IDH1(n, %)   | 16                     | 10.3% | 0                            | 0.0%  | 0.373        |
| IDH2(n, %)   | 14                     | 9.0%  | 3                            | 17.6% | 0.224        |
| CEBPA(n, %)  | 11                     | 7.1%  | 2                            | 11.8% | 0.620        |
| RUNX1(n, %)  | 13                     | 8.3%  | 2                            | 11.8% | 0.645        |
| NRAS(n, %)   | 9                      | 5.8%  | 3                            | 17.6% | 0.099        |
| TET2(n, %)   | 15                     | 9.6%  | 0                            | 0.0%  | 0.367        |
| NPM1(n, %)   | 46                     | 29.5% | 2                            | 11.8% | 0.158        |
| DNMT3A(n, %) | 38                     | 24.4% | 4                            | 23.5% | >0.999       |

**Table 2d.** Expression of *CD97 (ADGRE5)* (Z-score $\geq$ 1) according to the top mutations present in AML (N=173 patients)

| Genes        | Z-score(<1)<br>(n=147) |       | Z-score( $\geq$ 1)<br>(n=26) |       | p value      |
|--------------|------------------------|-------|------------------------------|-------|--------------|
| FLT3(n, %)   | 38                     | 25.9% | 11                           | 42.3% | 0.101        |
| TP53(n, %)   | 13                     | 8.8%  | 1                            | 3.8%  | 0.697        |
| WT1(n, %)    | 10                     | 6.8%  | 0                            | 0.0%  | 0.362        |
| IDH1(n, %)   | 15                     | 10.2% | 1                            | 3.8%  | 0.472        |
| IDH2(n, %)   | 14                     | 9.5%  | 3                            | 11.5% | 0.724        |
| CEBPA(n, %)  | 12                     | 8.2%  | 1                            | 3.8%  | 0.694        |
| RUNX1(n, %)  | 15                     | 10.2% | 0                            | 0.0%  | 0.131        |
| NRAS(n, %)   | 10                     | 6.8%  | 2                            | 7.7%  | >0.999       |
| TET2(n, %)   | 15                     | 10.2% | 0                            | 0.0%  | 0.131        |
| NPM1(n, %)   | 34                     | 23.1% | 14                           | 53.8% | <b>0.003</b> |
| DNMT3A(n, %) | 33                     | 22.4% | 9                            | 34.6% | 0.215        |

**Table 2e.** Expression of *EMR1(ADGRE1)* (Z-score $\geq$ 1) according to the top mutations present in AML(N=173 patients)

| Genes        | Z-score(<1)<br>(n=151) |       | Z-score( $\geq$ 1)<br>(n=22) |       | p value          |
|--------------|------------------------|-------|------------------------------|-------|------------------|
| FLT3(n, %)   | 41                     | 27.2% | 8                            | 36.4% | 0.448            |
| TP53(n, %)   | 14                     | 9.3%  | 0                            | 0.0%  | 0.221            |
| WT1(n, %)    | 10                     | 6.6%  | 0                            | 0.0%  | 0.365            |
| IDH1(n, %)   | 14                     | 9.3%  | 2                            | 9.1%  | >0.999           |
| IDH2(n, %)   | 12                     | 7.9%  | 5                            | 22.7% | <b>0.046</b>     |
| CEBPA(n, %)  | 13                     | 8.6%  | 0                            | 0.0%  | 0.378            |
| RUNX1(n, %)  | 14                     | 9.3%  | 1                            | 4.5%  | 0.696            |
| NRAS(n, %)   | 11                     | 7.3%  | 1                            | 4.5%  | >0.999           |
| TET2(n, %)   | 14                     | 9.3%  | 1                            | 4.5%  | 0.696            |
| NPM1(n, %)   | 34                     | 22.5% | 14                           | 63.6% | <b>&lt;0.001</b> |
| DNMT3A(n, %) | 34                     | 22.5% | 8                            | 36.4% | 0.184            |

**Table 2f.** Expression of *EMR2(ADGRE2)* (Z-score $\geq$ 1) according to the top mutations present in AML(N=173 patients)

| Genes        | Z-score(<1)<br>(n=142) |       | Z-score( $\geq$ 1)<br>(n=31) |       | p value |
|--------------|------------------------|-------|------------------------------|-------|---------|
| FLT3(n, %)   | 40                     | 28.2% | 9                            | 29.0% | >0.999  |
| TP53(n, %)   | 12                     | 8.5%  | 2                            | 6.5%  | >0.999  |
| WT1(n, %)    | 9                      | 6.3%  | 1                            | 3.2%  | 0.693   |
| IDH1(n, %)   | 13                     | 9.2%  | 3                            | 9.7%  | >0.999  |
| IDH2(n, %)   | 11                     | 7.7%  | 6                            | 19.4% | 0.087   |
| CEBPA(n, %)  | 12                     | 8.5%  | 1                            | 3.2%  | 0.468   |
| RUNX1(n, %)  | 12                     | 8.5%  | 3                            | 9.7%  | 0.734   |
| NRAS(n, %)   | 10                     | 7.0%  | 2                            | 6.5%  | >0.999  |
| TET2(n, %)   | 14                     | 9.9%  | 1                            | 3.2%  | 0.313   |
| NPM1(n, %)   | 35                     | 24.6% | 13                           | 41.9% | 0.075   |
| DNMT3A(n, %) | 31                     | 21.8% | 11                           | 35.5% | 0.113   |

**Table 2g.** Expression of *GPR56 (ADGRG1)* (Z-score $\geq$ 1) according to the top mutations present in AML (N=173 patients)

| Genes        | Z-score(<1) |       | Z-score( $\geq$ 1) |       | p value |
|--------------|-------------|-------|--------------------|-------|---------|
|              | (n=147)     |       | (n=26)             |       |         |
| FLT3(n, %)   | 39          | 26.5% | 10                 | 38.5% | 0.075   |
| TP53(n, %)   | 10          | 6.8%  | 4                  | 15.4% | 0.083   |
| WT1(n, %)    | 9           | 6.1%  | 1                  | 3.8%  | 1       |
| IDH1(n, %)   | 15          | 10.2% | 1                  | 3.8%  | 0.697   |
| IDH2(n, %)   | 16          | 10.9% | 1                  | 3.8%  | 0.7     |
| CEBPA(n, %)  | 12          | 8.2%  | 1                  | 3.8%  | 1       |
| RUNX1(n, %)  | 13          | 8.8%  | 2                  | 7.7%  | 1       |
| NRAS(n, %)   | 11          | 7.5%  | 1                  | 3.8%  | 1       |
| TET2(n, %)   | 12          | 8.2%  | 3                  | 11.5% | 0.411   |
| NPM1(n, %)   | 39          | 26.5% | 9                  | 34.6% | 0.2     |
| DNMT3A(n, %) | 35          | 23.8% | 7                  | 26.9% | 0.426   |

**Table 2h.** Expression of *GPR97 (ADGRG3)* (Z-score $\geq$ 1) according to the top mutations present in AML (N=173 patients)

| Genes        | Z-score(<1) |       | Z-score( $\geq$ 1) |       | p value      |
|--------------|-------------|-------|--------------------|-------|--------------|
|              | (n=150)     |       | (n=23)             |       |              |
| FLT3(n, %)   | 38          | 25.3% | 11                 | 47.8% | 0.044        |
| TP53(n, %)   | 11          | 7.3%  | 3                  | 13.0% | 0.404        |
| WT1(n, %)    | 8           | 5.3%  | 2                  | 8.7%  | 0.624        |
| IDH1(n, %)   | 13          | 8.7%  | 3                  | 13.0% | 0.451        |
| IDH2(n, %)   | 15          | 10.0% | 2                  | 8.7%  | 1            |
| CEBPA(n, %)  | 12          | 8.0%  | 1                  | 4.3%  | 1            |
| RUNX1(n, %)  | 14          | 9.3%  | 1                  | 4.3%  | 0.696        |
| NRAS(n, %)   | 10          | 6.7%  | 2                  | 8.7%  | 0.663        |
| TET2(n, %)   | 15          | 10.0% | 0                  | 0.0%  | 0.225        |
| NPM1(n, %)   | 37          | 24.7% | 11                 | 47.8% | <b>0.026</b> |
| DNMT3A(n, %) | 34          | 22.7% | 8                  | 34.8% | 0.204        |

**Table S3. Ingenuity pathway analysis of differentially expressed adhesion GPCR genes.**

| Ingenuity Canonical Pathways                                                                | -log(p-value)   | Ratio           | z-score       |
|---------------------------------------------------------------------------------------------|-----------------|-----------------|---------------|
| <b>EIF2 Signaling</b>                                                                       | <b>1.48E+01</b> | <b>3.48E-01</b> | <b>-2.828</b> |
| Regulation of eIF4 and p70S6K Signaling                                                     | 8.96E+00        | 3.25E-01        | 0.209         |
| Hereditary Breast Cancer Signaling                                                          | 8.91E+00        | 3.33E-01        | NaN           |
| Salvage Pathways of Pyrimidine Ribonucleotides                                              | 6.88E+00        | 3.51E-01        | 1.372         |
| mTOR Signaling                                                                              | 6.69E+00        | 2.75E-01        | 0             |
| Role of BRCA1 in DNA Damage Response                                                        | 6.31E+00        | 3.62E-01        | -1.5          |
| <b>Fc<math>\epsilon</math>2 Receptor-mediated Phagocytosis in Macrophages and Monocytes</b> | <b>6.30E+00</b> | <b>3.44E-01</b> | <b>3.182</b>  |
| Huntington's Disease Signaling                                                              | 6.18E+00        | 2.56E-01        | 0.392         |
| <b>IL-8 Signaling</b>                                                                       | <b>5.87E+00</b> | <b>2.66E-01</b> | <b>3.286</b>  |
| ATM Signaling                                                                               | 5.73E+00        | 3.27E-01        | -1.177        |
| Telomerase Signaling                                                                        | 5.67E+00        | 3.08E-01        | 0.577         |
| Pyridoxal 5'-phosphate Salvage Pathway                                                      | 5.50E+00        | 3.69E-01        | 2.041         |
| <b>Integrin Signaling</b>                                                                   | <b>5.48E+00</b> | <b>2.56E-01</b> | <b>3.501</b>  |
| Apoptosis Signaling                                                                         | 5.46E+00        | 3.23E-01        | 1.095         |
| PI3K/AKT Signaling                                                                          | 5.26E+00        | 2.90E-01        | -0.164        |
| Chronic Myeloid Leukemia Signaling                                                          | 5.25E+00        | 3.04E-01        | NaN           |
| Cell Cycle: G1/S Checkpoint Regulation                                                      | 5.23E+00        | 3.58E-01        | -0.277        |
| <b>B Cell Receptor Signaling</b>                                                            | <b>5.07E+00</b> | <b>2.58E-01</b> | <b>2.828</b>  |
| <b>NGF Signaling</b>                                                                        | <b>4.94E+00</b> | <b>2.88E-01</b> | <b>3.212</b>  |
| DNA Double-Strand Break Repair by Homologous Recombination                                  | 4.69E+00        | 6.43E-01        | NaN           |
| Acute Myeloid Leukemia Signaling                                                            | 4.69E+00        | 3.03E-01        | 1.732         |
| p70S6K Signaling                                                                            | 4.69E+00        | 2.75E-01        | 1.333         |
| Cell Cycle: G2/M DNA Damage Checkpoint Regulation                                           | 4.69E+00        | 3.80E-01        | 2             |
| Molecular Mechanisms of Cancer                                                              | 4.68E+00        | 2.16E-01        | NaN           |
| <b>Cyclins and Cell Cycle Regulation</b>                                                    | <b>4.63E+00</b> | <b>3.21E-01</b> | <b>-2.324</b> |

a.

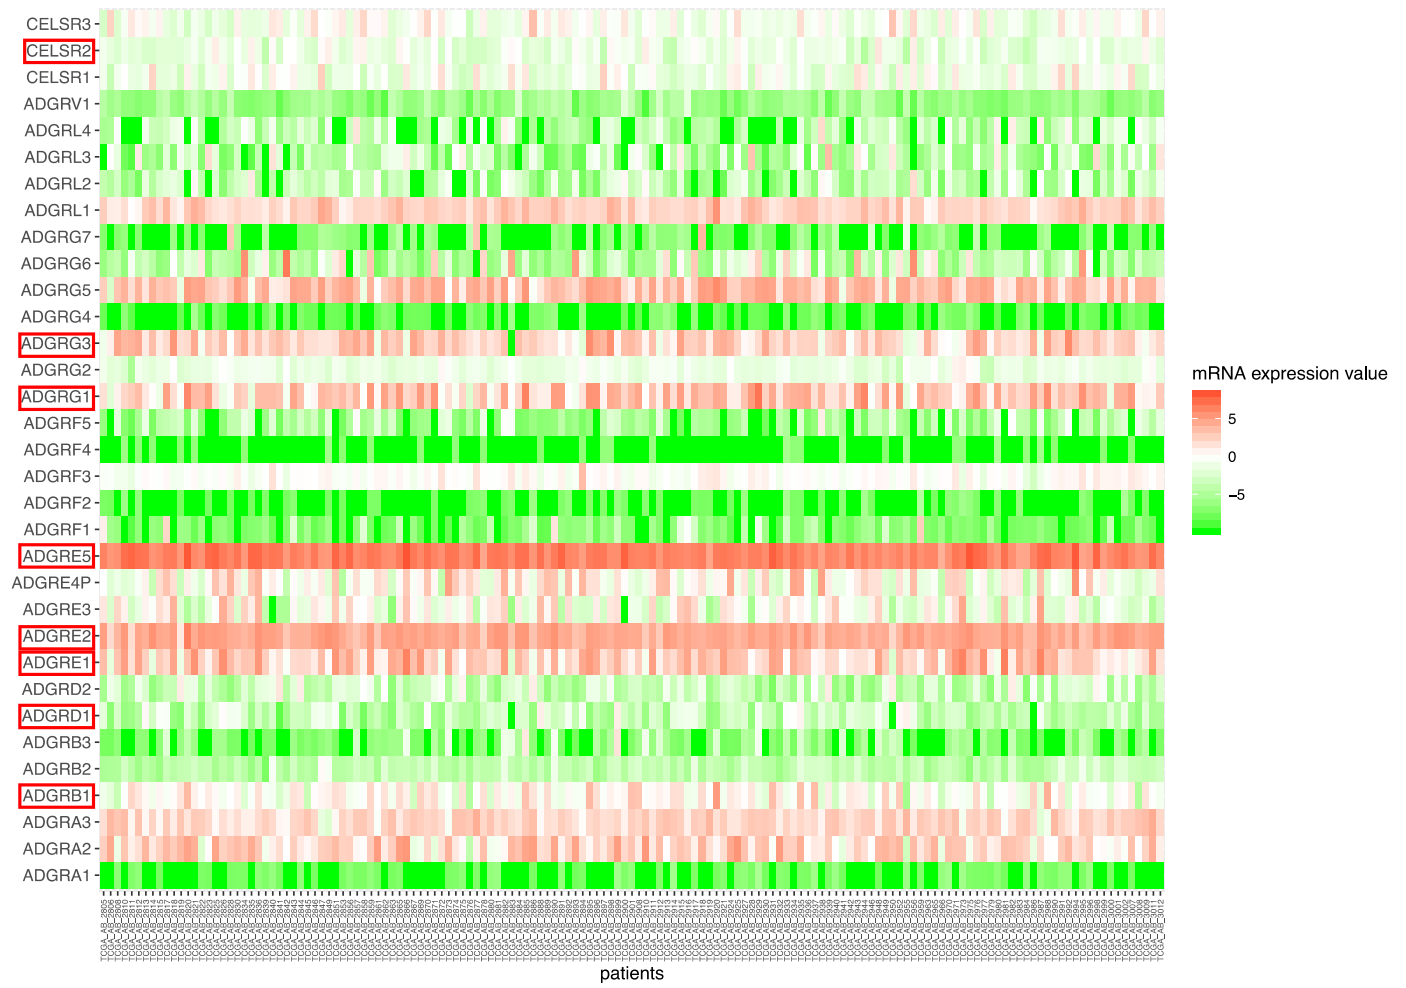



**b.**

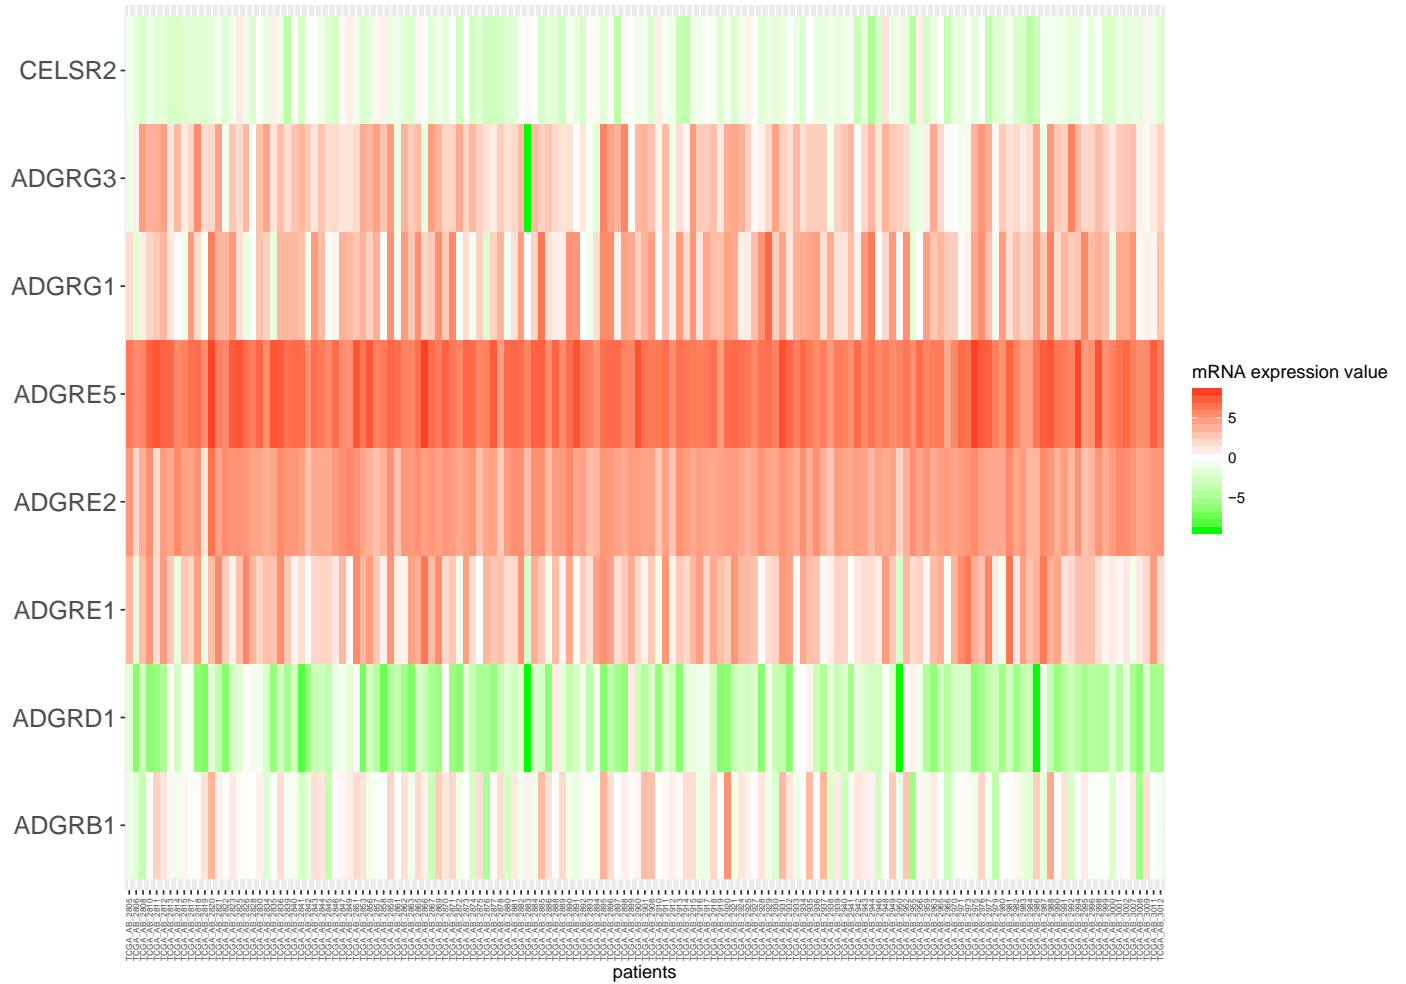

**Figure S1. Heatmaps of the adhesion GPCR genes. a.** Heatmap of the expression of the 33 aGPCR genes (obtained from TCGA-AML). The red rectangles indicate the eight aGPCRs found to be associated with worse clinical outcome. **b.** Heatmap of the eight aGPCR genes only (red represent high RNA expression, green represent low RNA expression).

a.

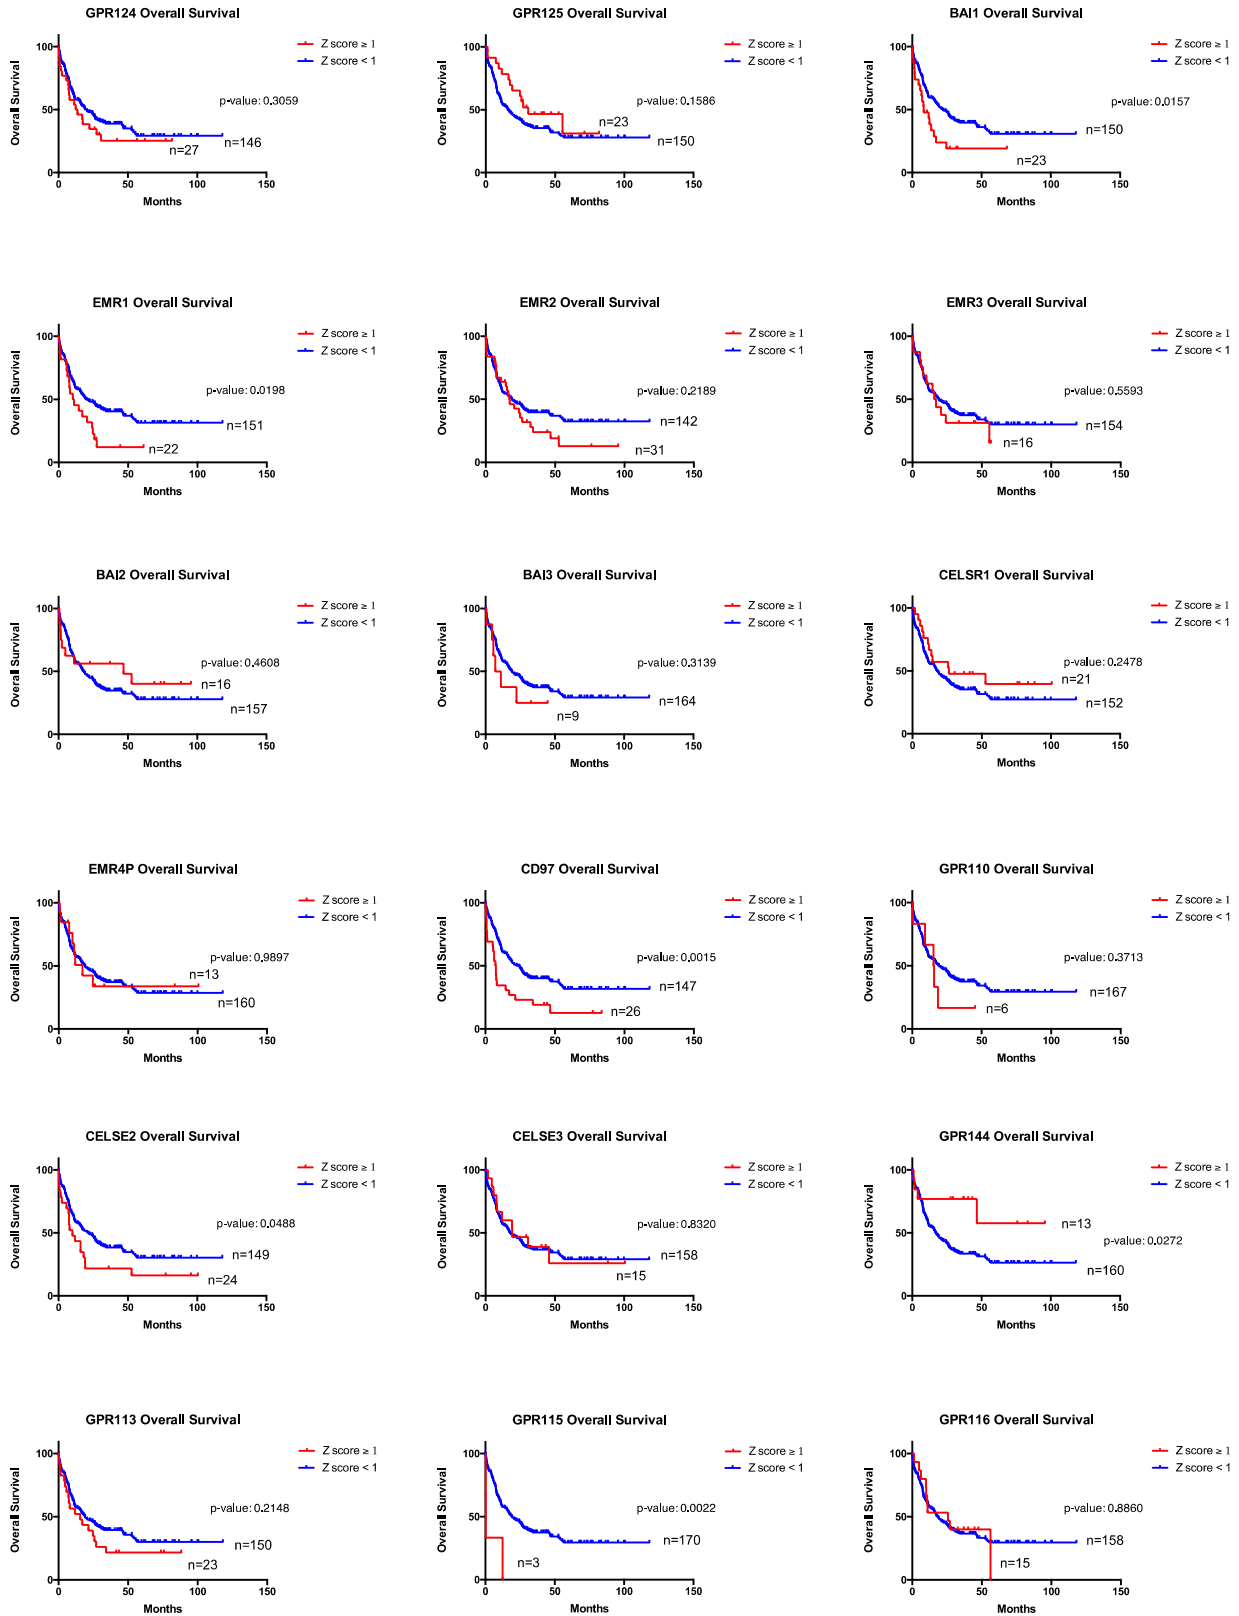

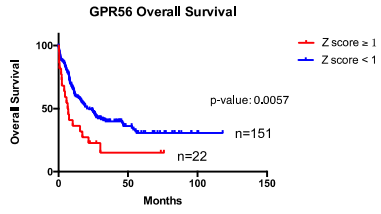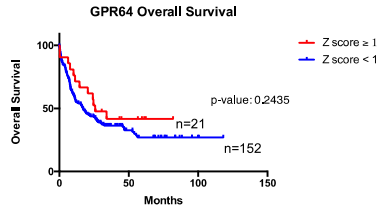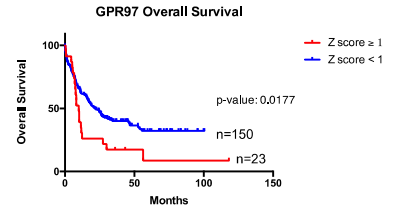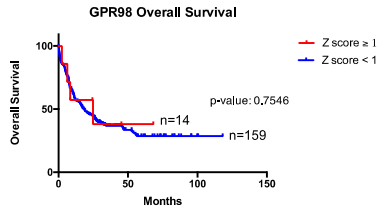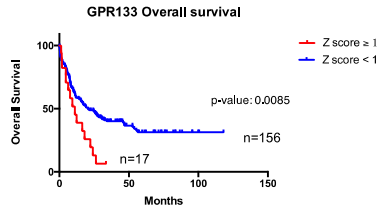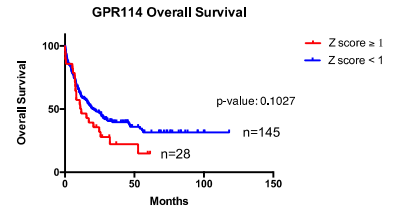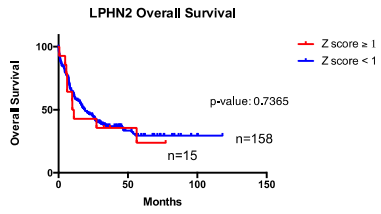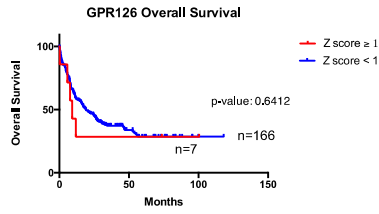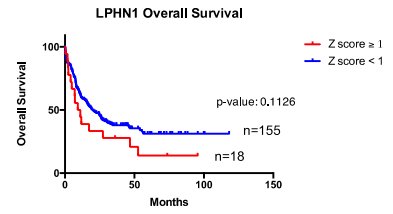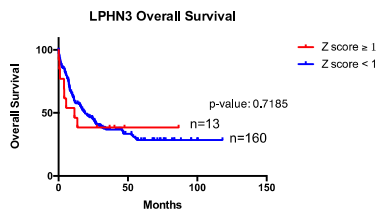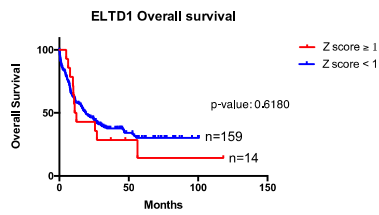

b.

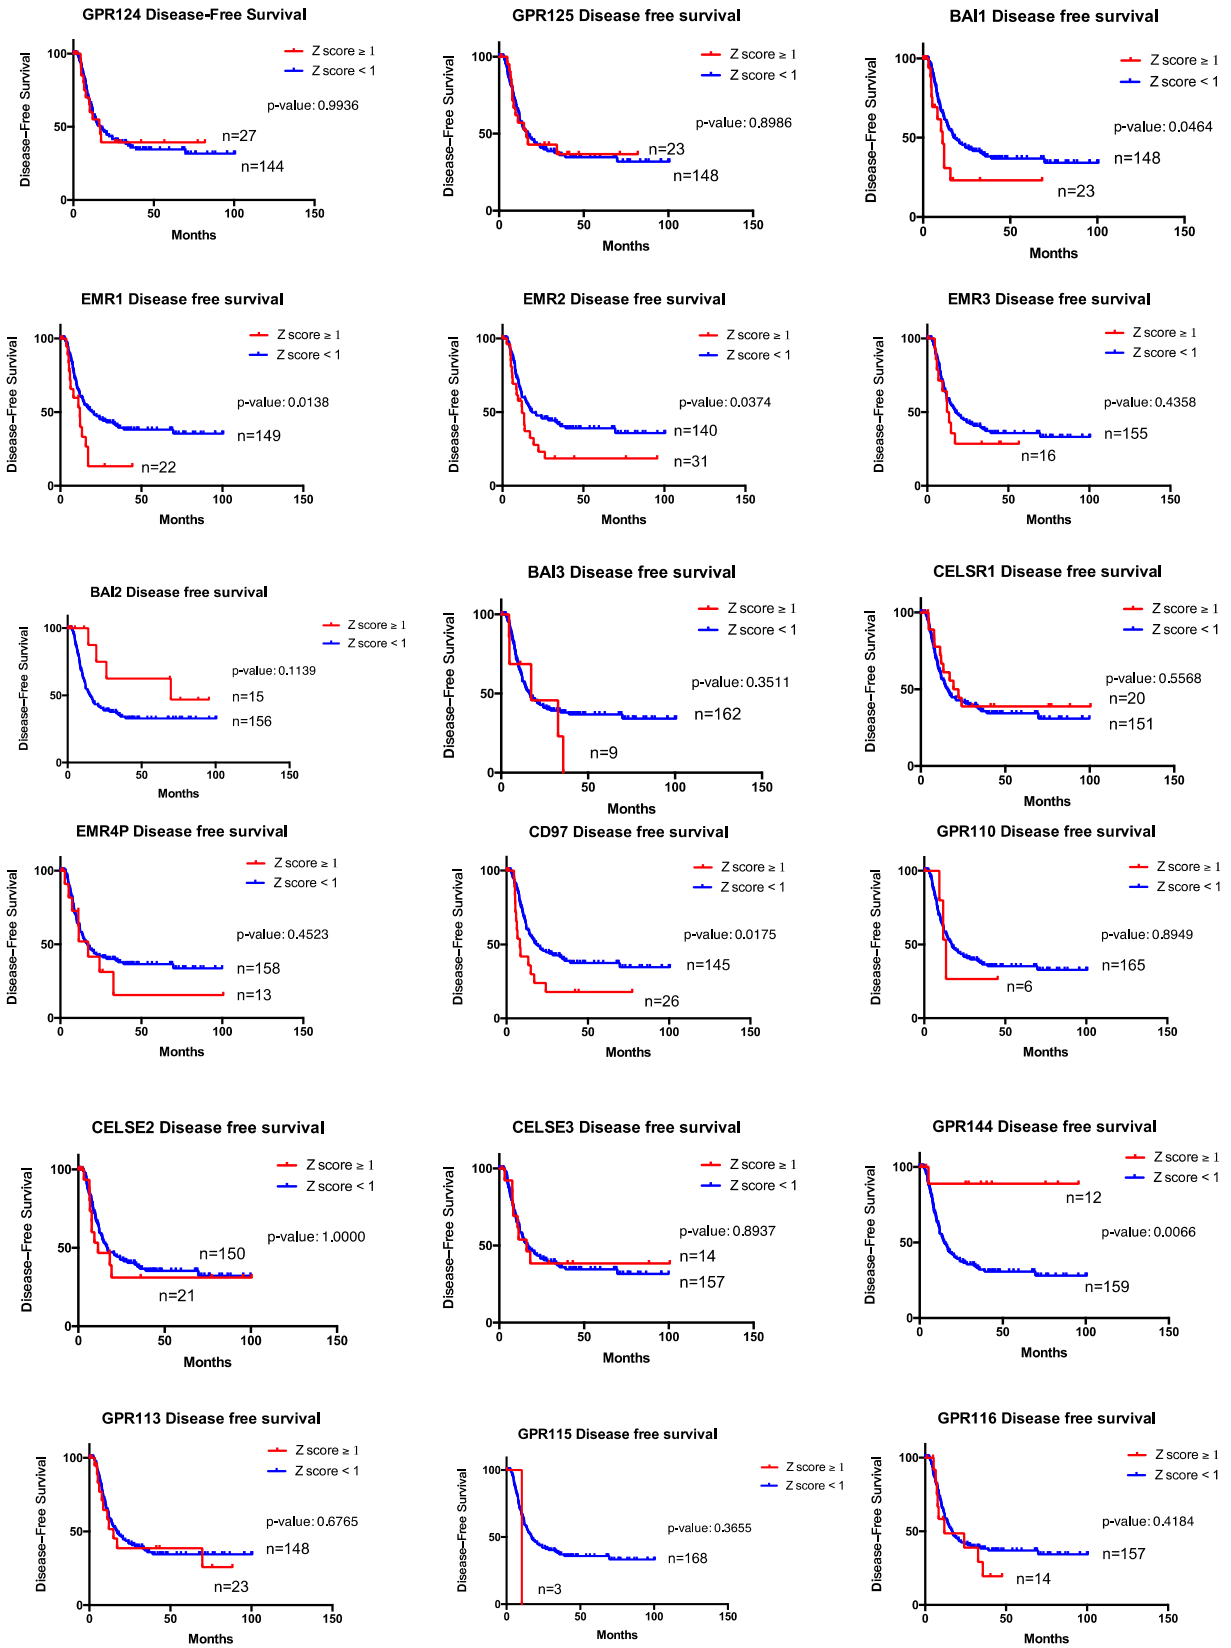

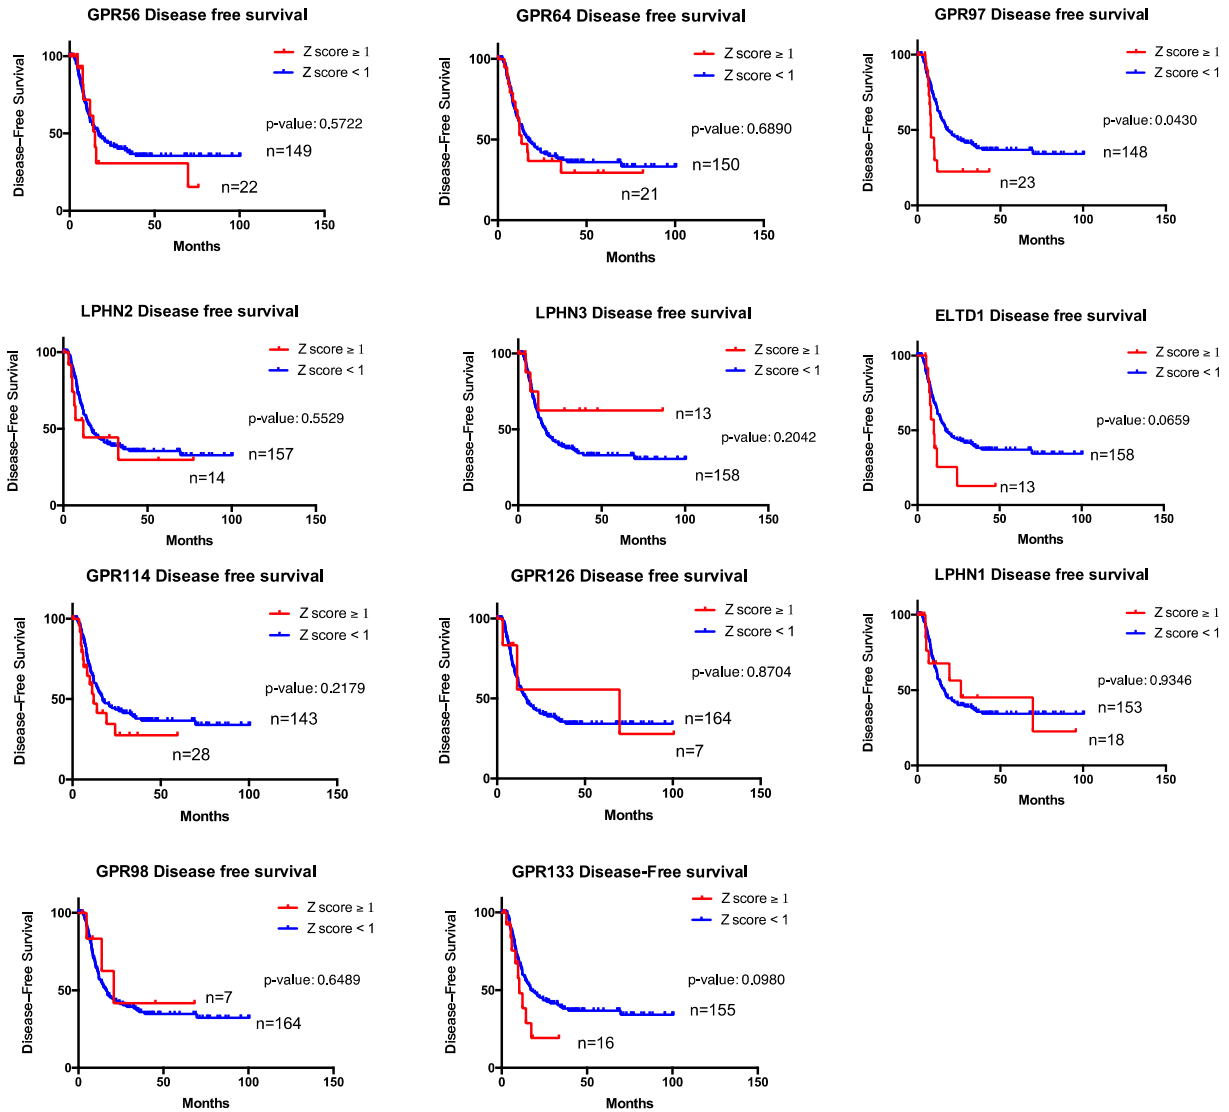

**Figure S2. Survival analysis of AML patients associated with 29 adhesion GPCRs mRNA expression.** a. Overall survival analysis of AML patients associated with 29 individual aGPCRs. b. Disease-free survival analysis of AML patients associated with 29 individual aGPCRs

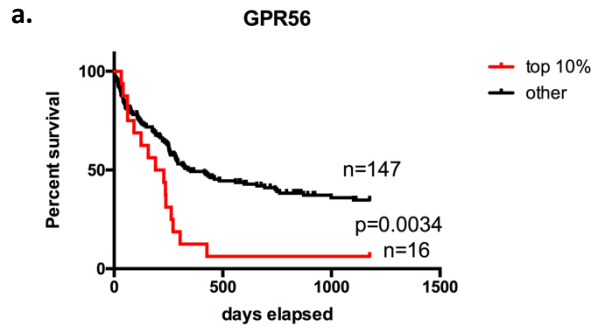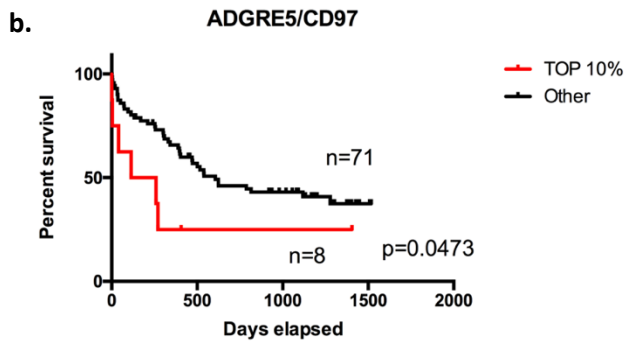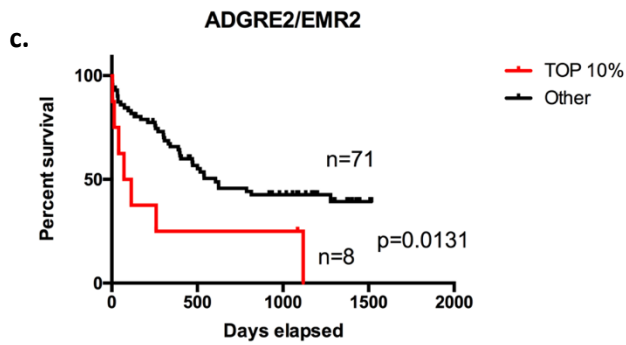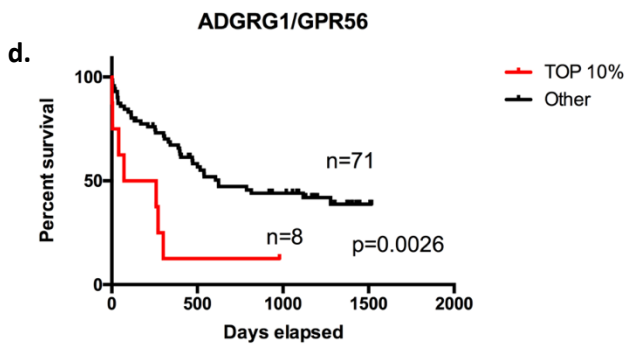

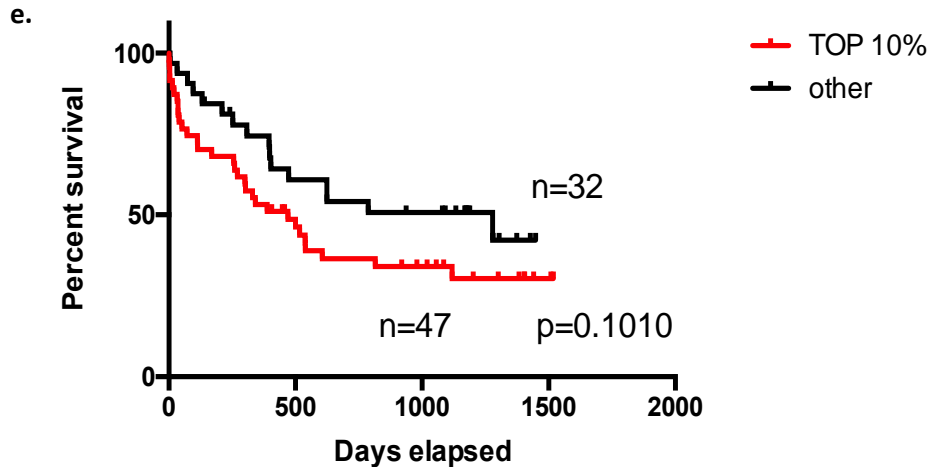

**Figure S3. Survival analysis of AML associated with eight adhesion GPCRs mRNA expression in Metzeler Leukemia 1 and 2 datasets. a.** Overall survival analysis of AML patients in Metzeler leukemia 1 dataset, associated with *ADGRG1(GPR56)*. **b,c,d.** Overall survival analysis of AML patients in Metzeler leukemia 2 dataset, associated with *ADGRG1(GPR56)*, *ADGRE2(EMR2)*, *ADGRE5(CD97)*. **e.** Overall survival of 79 AML patients from the Metzeler2 dataset dichotomized into 8-aGPCRs high (patients with at least one of the eight aGPCRs among the top 10% mRNA expression level) and low group (the remainder patients, or those with none of the eight genes among the top 10% mRNA expression level). The 8 genes are: *ADGRB1 (BAI1)*, *ADGRC2 (CELSE2)*, *ADGRE1 (EMR1)*, *ADGRE2 (EMR2)*, *ADGRE5 (CD97)*, *ADGRG1 (GPR56)*, *ADGRG3 (GPR97)*, *ADGRG5 (GPR133)*.

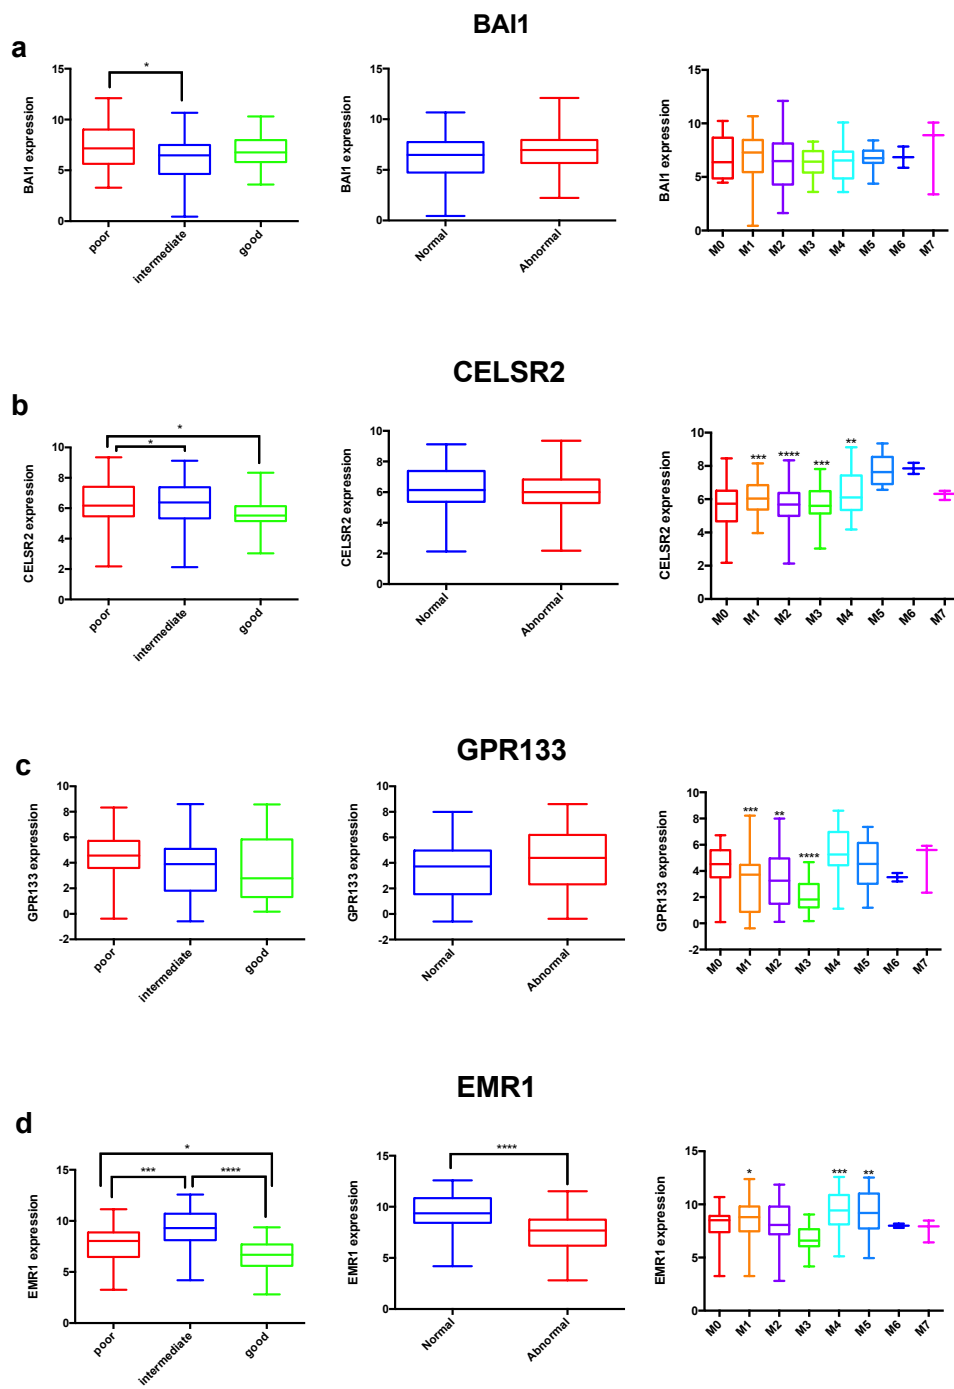



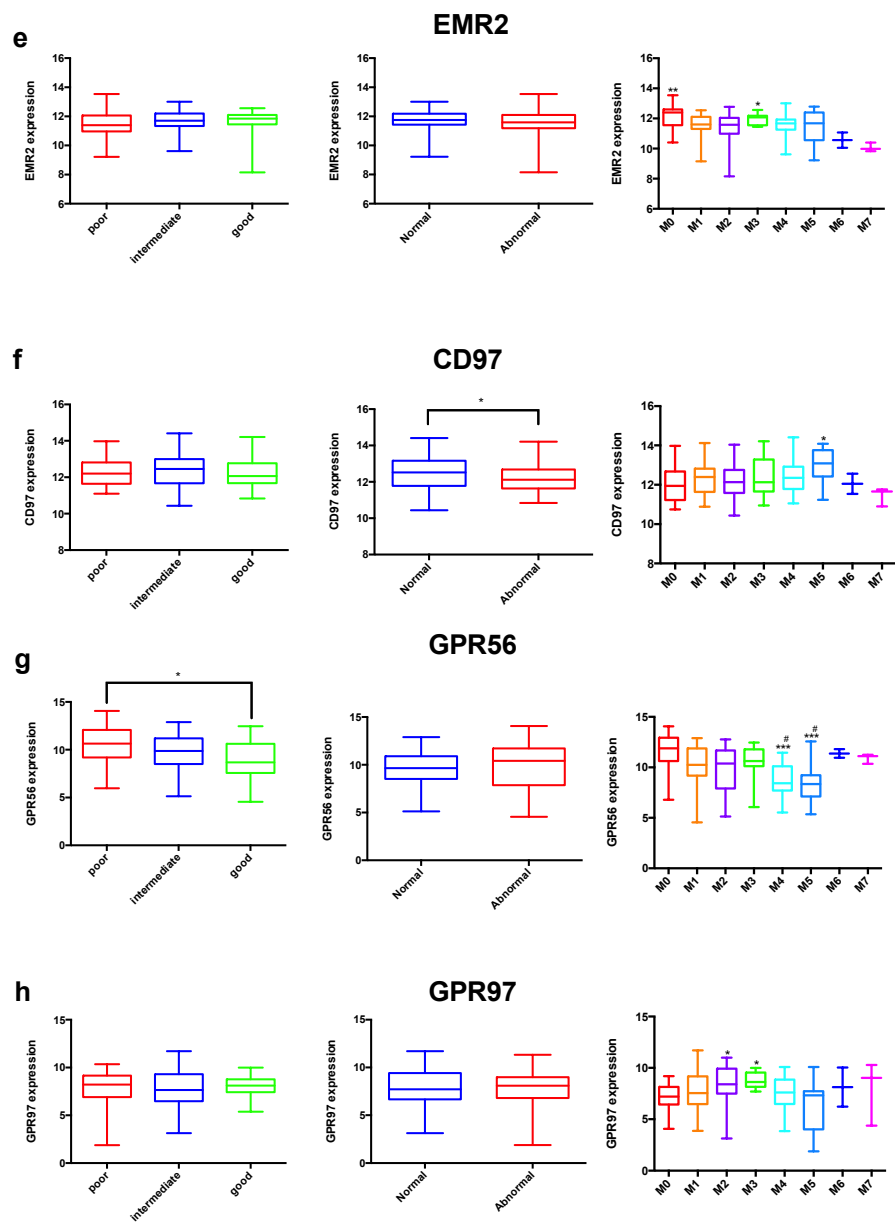

**Figure S4. Eight adhesion GPCRs mRNA expression in patients with AML according to molecular risk status, cytogenetic and FAB classifications.** log<sub>2</sub> mRNA expression for all the eight genes were categorized by Molecular risk status, cytogenetic and FAB classifications (from left to right): \*p < 0.05; \*\*p < 0.01; \*\*\*p < 0.001. **a.** *BAI*; **b.** *CELSR2*; **c.** *GPR133*; **d.** *EMR1*; **e.** *EMR2*; **f.** *CD97*; **g.** *GPR56*; **h.** *GPR97*.

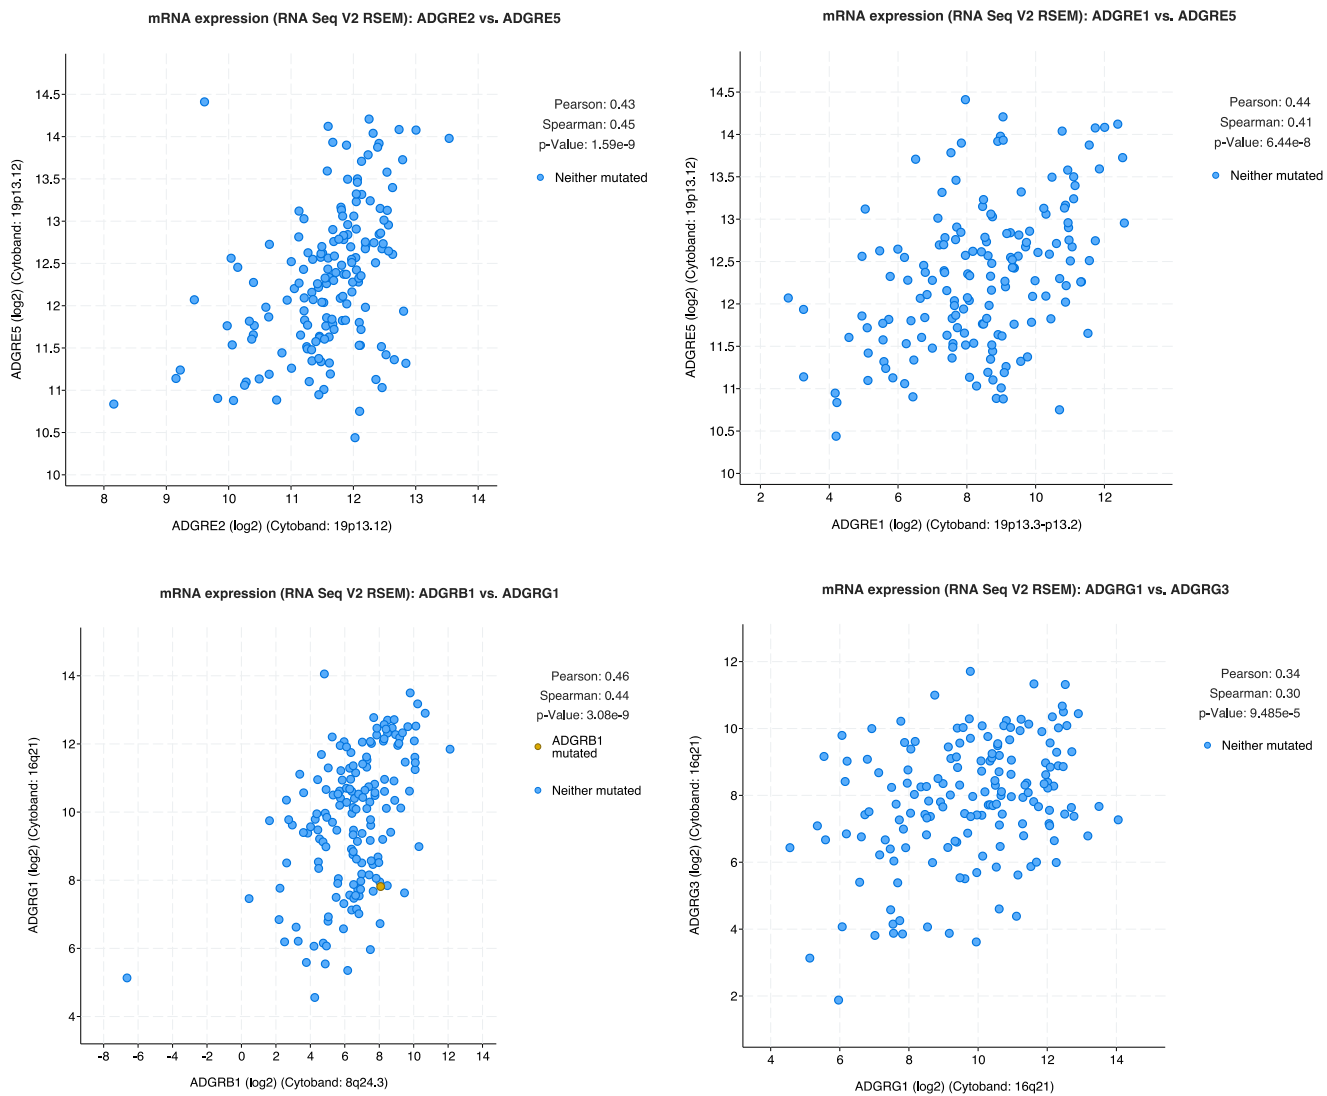

**Figure S5. Correlation between expression levels of the eight adhesion GPCRs genes.** Spearman's rho correlation analysis and Pearson correlation analysis between expression levels of the eight aGPCR genes are conducted. Scatter-plots showing a  $\log_2$  transformed mRNA expression levels of *ADGRE5* and *ADGRE2*, *ADGRE5* and *ADGRE1*, *ADGRB1* and *ADGRG1*, *ADGRG1* and *ADGRG3*. Expression correlations are shown in four pairs of the eight genes.

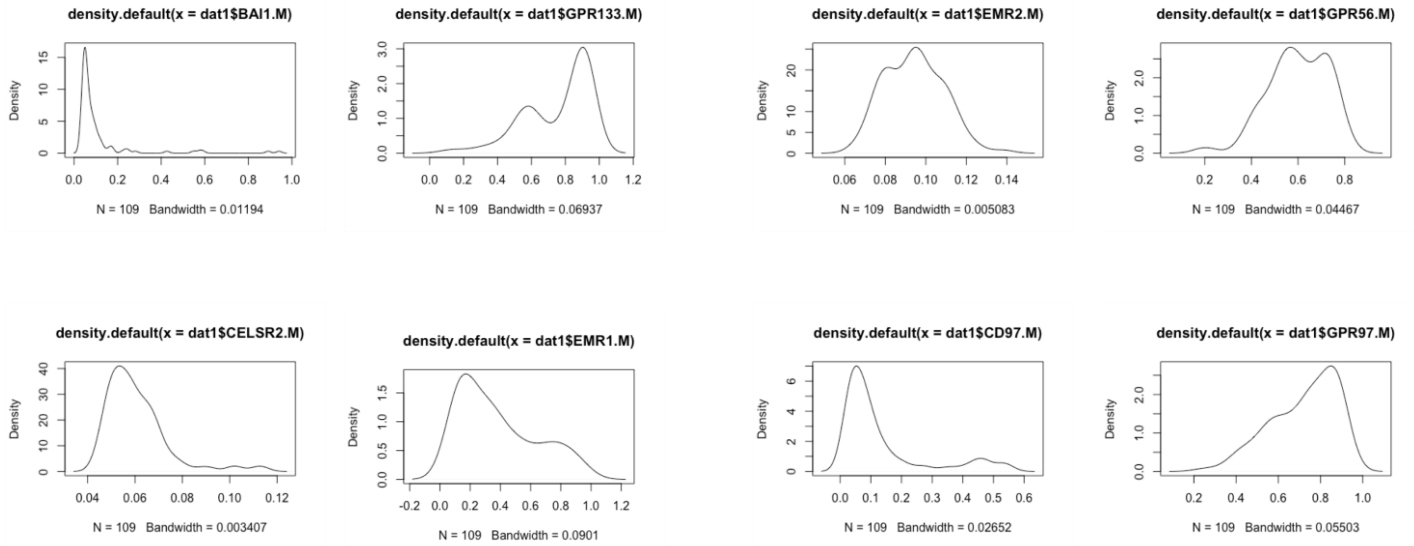

**Figure S6. The methylation  $\beta$  value distribution of 109 patients in each of the eight adherence GPCR genes.** The 109 patients from the TCGA dataset whose methylation value are available were included in the analysis. The X-axis represent the methylation  $\beta$ -value, the Y-axis represent the distribution of the patients.

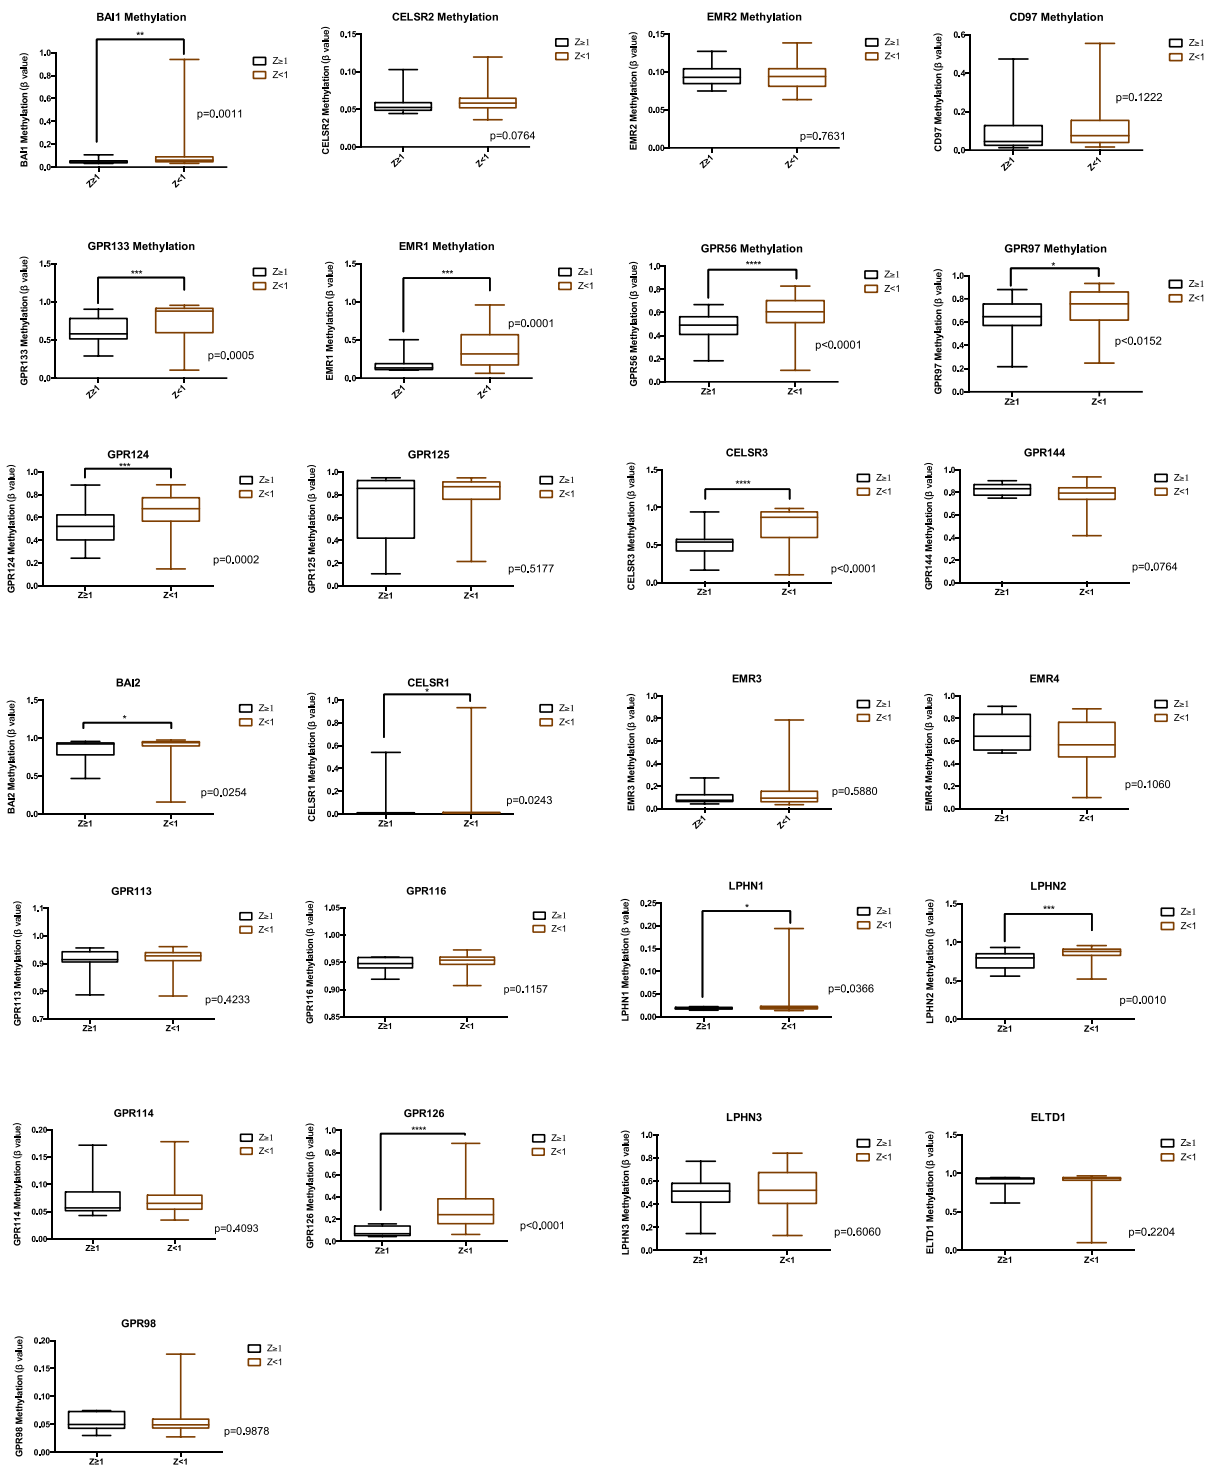

**Figure S7. Associations between methylation and individual adhesion GPCR mRNA expression.** Adhesion GPCRs methylation  $\beta$  value comparison between patients according to their expression ( $Z$ -score  $\geq 1$  and  $< 1$ ). A non-parametric Mann–Whitney U test was used to compare the median of methylation  $\beta$  value between the groups.

Similarities are on the lower-left side of the table, and identities on the upper-right.

|                    | 1  | 2  | 3  | 4  | 5  | 6  | 7  | 8  | 9  | 10 | 11 | 12 | 13 | 14 | 15 | 16 | 17 | 18 | 19 | 20 | 21 | 22 | 23 | 24 | 25 | 26 | 27 | 28 | 29 | 30 | 31 | 32 | 33 |    |
|--------------------|----|----|----|----|----|----|----|----|----|----|----|----|----|----|----|----|----|----|----|----|----|----|----|----|----|----|----|----|----|----|----|----|----|----|
| 1. [Human] ADGRL1  | -  | 78 | 88 | 87 | 40 | 41 | 42 | 38 | 44 | 21 | 20 | 21 | 33 | 33 | 32 | 37 | 37 | 24 | 18 | 20 | 22 | 28 | 28 | 28 | 27 | 28 | 29 | 28 | 32 | 28 | 30 | 28 | 22 |    |
| 2. [Human] ADGRL2  | 89 | -  | 73 | 65 | 40 | 39 | 41 | 38 | 45 | 20 | 20 | 20 | 33 | 32 | 29 | 34 | 28 | 24 | 18 | 28 | 22 | 27 | 26 | 27 | 27 | 28 | 30 | 28 | 32 | 26 | 31 | 27 | 22 |    |
| 3. [Human] ADGRL3  | 84 | 88 | -  | 84 | 39 | 38 | 41 | 40 | 45 | 21 | 21 | 20 | 34 | 35 | 32 | 36 | 27 | 25 | 18 | 28 | 23 | 26 | 26 | 31 | 30 | 28 | 32 | 28 | 35 | 28 | 33 | 29 | 22 |    |
| 4. [Human] ADGRL4  | 74 | 74 | 72 | -  | 40 | 42 | 42 | 40 | 43 | 21 | 19 | 20 | 30 | 29 | 30 | 32 | 25 | 25 | 21 | 28 | 24 | 28 | 28 | 30 | 28 | 22 | 33 | 29 | 32 | 27 | 26 | 29 | 18 |    |
| 5. [Human] ADGRE1  | 58 | 58 | 59 | 58 | -  | 84 | 84 | 82 | 48 | 21 | 21 | 18 | 32 | 27 | 28 | 35 | 27 | 22 | 18 | 24 | 21 | 21 | 24 | 28 | 23 | 24 | 27 | 23 | 29 | 29 | 24 | 24 | 22 |    |
| 6. [Human] ADGRE2  | 59 | 58 | 61 | 59 | 68 | -  | 82 | 81 | 44 | 20 | 21 | 20 | 32 | 31 | 25 | 30 | 26 | 24 | 19 | 30 | 24 | 24 | 25 | 25 | 23 | 31 | 23 | 29 | 26 | 29 | 24 | 21 | 21 |    |
| 7. [Human] ADGRE3  | 59 | 57 | 61 | 60 | 70 | 90 | -  | 61 | 46 | 18 | 18 | 18 | 32 | 33 | 28 | 31 | 28 | 25 | 20 | 30 | 23 | 26 | 28 | 27 | 27 | 23 | 32 | 26 | 31 | 28 | 29 | 28 | 22 |    |
| 8. [Human] ADGRE4P | 58 | 58 | 62 | 60 | 69 | 76 | 76 | -  | 45 | 18 | 18 | 18 | 31 | 31 | 28 | 31 | 27 | 23 | 18 | 28 | 21 | 23 | 23 | 24 | 22 | 24 | 29 | 24 | 29 | 26 | 27 | 24 | 18 |    |
| 9. [Human] ADGRE5  | 82 | 83 | 82 | 82 | 69 | 82 | 84 | 83 | -  | 23 | 22 | 24 | 31 | 28 | 29 | 33 | 28 | 24 | 23 | 32 | 28 | 25 | 27 | 26 | 28 | 24 | 28 | 28 | 28 | 29 | 26 | 28 | 18 |    |
| 10. [Human] ADGRA1 | 39 | 40 | 40 | 39 | 33 | 38 | 35 | 35 | 38 | -  | 58 | 59 | 24 | 18 | 24 | 20 | 17 | 17 | 18 | 18 | 20 | 18 | 21 | 20 | 20 | 17 | 23 | 17 | 18 | 22 | 19 | 18 | 18 |    |
| 11. [Human] ADGRA2 | 38 | 37 | 38 | 38 | 38 | 37 | 38 | 37 | 38 | 71 | -  | 51 | 21 | 20 | 22 | 21 | 18 | 18 | 14 | 18 | 18 | 18 | 18 | 17 | 18 | 18 | 17 | 18 | 18 | 17 | 18 | 20 | 18 | 18 |
| 12. [Human] ADGRA3 | 38 | 40 | 41 | 38 | 37 | 38 | 38 | 38 | 43 | 73 | 65 | -  | 24 | 20 | 22 | 19 | 18 | 18 | 16 | 17 | 22 | 16 | 21 | 19 | 22 | 18 | 21 | 18 | 21 | 17 | 21 | 18 | 18 | 18 |
| 13. [Human] CELSR1 | 56 | 56 | 57 | 52 | 54 | 55 | 55 | 52 | 53 | 42 | 37 | 44 | -  | 57 | 49 | 32 | 24 | 21 | 17 | 24 | 22 | 21 | 28 | 23 | 25 | 20 | 29 | 21 | 29 | 22 | 26 | 23 | 21 |    |
| 14. [Human] CELSR2 | 82 | 83 | 84 | 49 | 47 | 48 | 48 | 48 | 47 | 38 | 38 | 43 | 77 | -  | 48 | 20 | 31 | 23 | 19 | 26 | 21 | 22 | 28 | 27 | 28 | 24 | 27 | 21 | 24 | 22 | 26 | 27 | 21 |    |
| 15. [Human] CELSR3 | 80 | 47 | 51 | 45 | 48 | 51 | 49 | 48 | 48 | 41 | 38 | 43 | 65 | 66 | -  | 35 | 30 | 20 | 18 | 22 | 22 | 22 | 28 | 25 | 25 | 24 | 27 | 18 | 24 | 23 | 25 | 19 | 21 |    |
| 16. [Human] ADGRD1 | 57 | 54 | 58 | 55 | 51 | 51 | 52 | 50 | 53 | 37 | 38 | 41 | 62 | 50 | 55 | -  | 33 | 28 | 20 | 28 | 28 | 28 | 30 | 31 | 31 | 24 | 29 | 22 | 29 | 28 | 30 | 22 | 20 |    |
| 17. [Human] ADGRD2 | 45 | 45 | 44 | 43 | 44 | 45 | 46 | 47 | 43 | 32 | 36 | 32 | 44 | 45 | 45 | 49 | -  | 22 | 28 | 28 | 23 | 25 | 24 | 22 | 24 | 25 | 23 | 23 | 22 | 24 | 23 | 22 | 18 |    |
| 18. [Human] ADGRF1 | 41 | 41 | 44 | 45 | 44 | 40 | 41 | 41 | 43 | 32 | 33 | 35 | 44 | 38 | 38 | 46 | 39 | -  | 45 | 38 | 55 | 53 | 28 | 28 | 28 | 17 | 25 | 21 | 27 | 23 | 21 | 23 | 18 |    |
| 19. [Human] ADGRF2 | 38 | 38 | 37 | 38 | 40 | 34 | 35 | 35 | 39 | 35 | 29 | 31 | 36 | 34 | 33 | 37 | 42 | 59 | -  | 33 | 52 | 44 | 21 | 19 | 20 | 18 | 19 | 21 | 18 | 18 | 18 | 17 | 17 |    |
| 20. [Human] ADGRF3 | 44 | 47 | 45 | 45 | 48 | 45 | 45 | 44 | 49 | 32 | 35 | 34 | 47 | 43 | 41 | 45 | 44 | 56 | 52 | -  | 39 | 42 | 24 | 23 | 24 | 22 | 23 | 22 | 24 | 22 | 24 | 23 | 17 |    |
| 21. [Human] ADGRF4 | 40 | 40 | 43 | 42 | 45 | 40 | 41 | 40 | 43 | 34 | 34 | 38 | 45 | 39 | 41 | 47 | 40 | 73 | 62 | 60 | -  | 53 | 24 | 24 | 24 | 18 | 24 | 22 | 22 | 18 | 23 | 20 | 18 |    |
| 22. [Human] ADGRF5 | 44 | 44 | 46 | 42 | 38 | 36 | 40 | 41 | 40 | 33 | 31 | 35 | 42 | 38 | 41 | 62 | 38 | 70 | 56 | 59 | 59 | -  | 28 | 28 | 28 | 18 | 24 | 21 | 23 | 18 | 26 | 22 | 17 |    |
| 23. [Human] ADGRB1 | 48 | 50 | 52 | 48 | 49 | 51 | 52 | 50 | 50 | 35 | 32 | 38 | 50 | 47 | 48 | 49 | 41 | 43 | 38 | 48 | 48 | 44 | -  | 73 | 59 | 18 | 27 | 24 | 29 | 24 | 26 | 25 | 22 |    |
| 24. [Human] ADGRB2 | 48 | 49 | 52 | 49 | 48 | 48 | 47 | 47 | 46 | 33 | 32 | 34 | 49 | 45 | 47 | 50 | 38 | 43 | 35 | 43 | 42 | 43 | 85 | -  | 76 | 18 | 30 | 23 | 29 | 25 | 30 | 25 | 21 |    |
| 25. [Human] ADGRB3 | 49 | 48 | 51 | 48 | 45 | 49 | 49 | 45 | 46 | 34 | 32 | 37 | 49 | 45 | 48 | 50 | 39 | 42 | 38 | 43 | 45 | 44 | 88 | 89 | -  | 18 | 28 | 23 | 27 | 27 | 25 | 22 | 22 |    |
| 26. [Human] ADGRG1 | 46 | 46 | 45 | 39 | 41 | 38 | 37 | 42 | 41 | 32 | 35 | 36 | 35 | 35 | 39 | 44 | 40 | 38 | 35 | 38 | 37 | 37 | 37 | 37 | 39 | -  | 32 | 27 | 31 | 35 | 33 | 31 | 18 |    |
| 27. [Human] ADGRG2 | 47 | 47 | 49 | 43 | 48 | 47 | 43 | 48 | 48 | 39 | 38 | 41 | 46 | 44 | 45 | 49 | 42 | 43 | 37 | 41 | 44 | 40 | 49 | 48 | 48 | 53 | -  | 52 | 57 | 35 | 62 | 28 | 23 |    |
| 28. [Human] ADGRG3 | 42 | 42 | 43 | 42 | 38 | 41 | 41 | 41 | 41 | 31 | 34 | 33 | 39 | 38 | 38 | 40 | 37 | 40 | 35 | 38 | 39 | 37 | 39 | 37 | 39 | 43 | 52 | -  | 33 | 31 | 31 | 28 | 22 |    |
| 29. [Human] ADGRG4 | 49 | 49 | 54 | 49 | 49 | 46 | 47 | 48 | 47 | 33 | 33 | 36 | 44 | 43 | 41 | 48 | 41 | 42 | 35 | 40 | 43 | 38 | 49 | 47 | 47 | 52 | 62 | 48 | -  | 34 | 54 | 30 | 22 |    |
| 30. [Human] ADGRG5 | 40 | 40 | 43 | 44 | 44 | 42 | 44 | 43 | 44 | 34 | 35 | 35 | 39 | 38 | 39 | 43 | 39 | 41 | 32 | 37 | 39 | 34 | 39 | 41 | 38 | 54 | 58 | 48 | 54 | -  | 33 | 28 | 20 |    |
| 31. [Human] ADGRG6 | 50 | 49 | 53 | 49 | 44 | 49 | 48 | 47 | 45 | 40 | 38 | 39 | 45 | 45 | 45 | 49 | 42 | 42 | 35 | 41 | 44 | 43 | 48 | 47 | 47 | 54 | 76 | 48 | 76 | 55 | -  | 28 | 21 |    |
| 32. [Human] ADGRG7 | 45 | 48 | 48 | 46 | 48 | 45 | 46 | 48 | 52 | 34 | 35 | 36 | 46 | 44 | 45 | 43 | 41 | 39 | 34 | 41 | 39 | 37 | 40 | 49 | 47 | 42 | 51 | 45 | 50 | 48 | 49 | -  | 20 |    |
| 33. [Human] ADGRV1 | 42 | 43 | 45 | 39 | 42 | 38 | 38 | 40 | 40 | 34 | 32 | 31 | 41 | 42 | 40 | 41 | 38 | 38 | 33 | 36 | 41 | 39 | 42 | 40 | 40 | 35 | 43 | 42 | 45 | 37 | 43 | 40 | -  | 18 |

**Figure S8: A matrix of the structure similarity between members of the aGPCR family:** Similarity are shown on the lower-left side of the table and identities on the upper-right. The color of each score ranged from red (the lowest) to green (the highest). The figure was generated on [gpcrd.org/similaritymatrix/](http://gpcrd.org/similaritymatrix/) and selecting for structurally conserved positions for the sequence segment selection.
